# Supplementary material for: Antiproliferative Activity of Non-Calcemic Vitamin D Analogs on Human Melanoma Lines in Relation to VDR and PDIA3 Receptors
Source: PubMed Central journal article supplement (PMC6163194; doi:10.3390/ijms19092583), 2018-08-31
Supplement: ijms-19-02583-s001.pdf [file ijms-19-02583-s001.pdf]

## Supplementary Materials

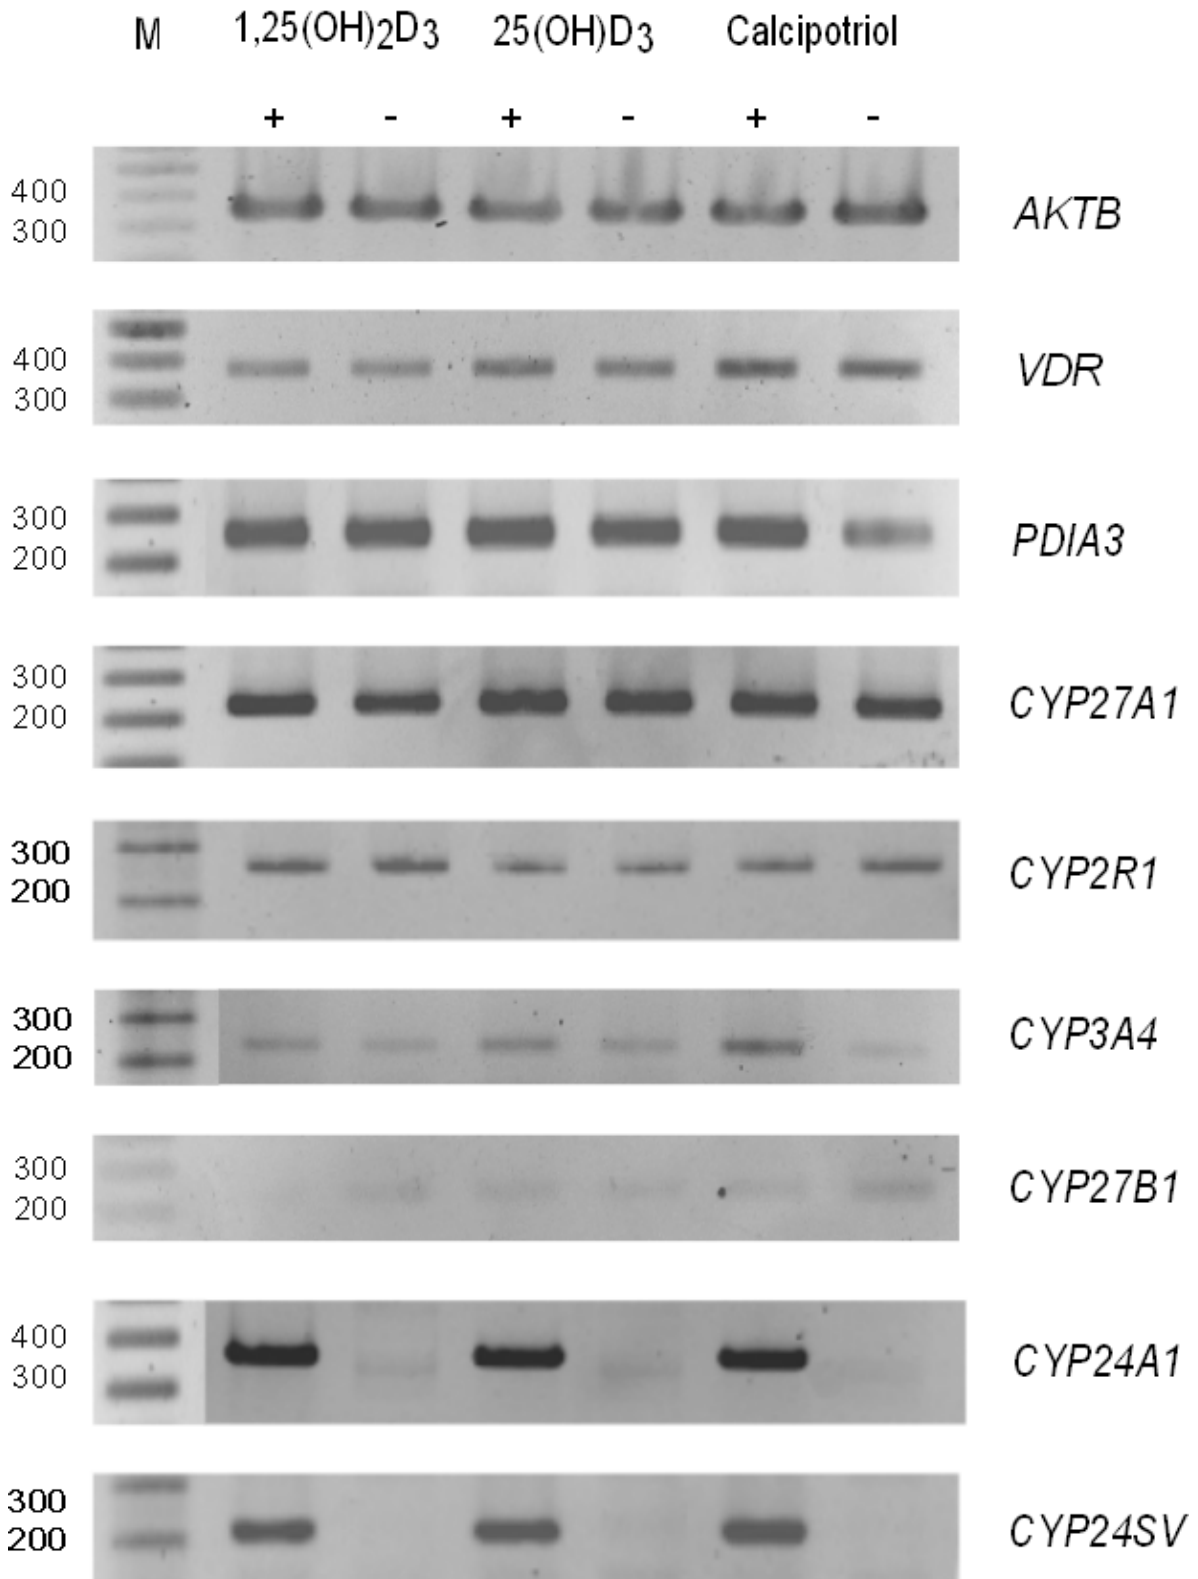

**Figure S1.** Analysis of induction of *VDR*, *PDIA3*, *CYP27A1*, *CYP2R1*, *CYP3A4*, *CYP27B1*, *CYP24A1* and *CYP24SV* (mRNA) after 1,25(OH)<sub>2</sub>D<sub>3</sub>, 25(OH)D<sub>3</sub> or calcipotriol treatment (1 μM, 24 h) using WM98 cell line. The relative amount of mRNA was determined by semiquantitative PCR method normalized to *AKTB* mRNA level. The specificity of the PCR products were evaluated in relation to molecular weight marker (M) to confirm the lengths of amplicons as presented in Table S1.

**Table S1.** Sequences of design primers used to amplify fragments of genes (from 180 base pairs to 384 base pairs) related with vitamin D response. Primers were designed using human melanoma genes sequences from NCBI BLAST, <http://blast.ncbi.nlm.nih.gov/>. Melting temperature of primers calculated using Primer Quest Software. GAPDH primers were supplemented to RevertAid™ First Strand cDNA Synthesis Kit (Fermentas, Vilnius, Lithuania).

|    | Sequence                                             | Name                                   | Organism                     | Temp. (°C)     | b.p.             |
|----|------------------------------------------------------|----------------------------------------|------------------------------|----------------|------------------|
| 1  | GCTCGTCGTCGACAACGGCTC<br>CAAACATGATCTGGGTCATCTTCT    | <i>AKTB F</i><br><i>AKTB R</i>         | Homo sapiens<br>Homo sapiens | 60,2<br>54     | 353              |
| 2  | CAAGGTCATCCATGACAACCTTG<br>GTCCACCACCCTGTTGCTGTAG    | <i>GAPDH F</i><br><i>GAPDH R</i>       | Homo sapiens<br>Homo sapiens |                |                  |
| 3  | CCAGTTCGTGTGAATGATGG<br>GTCGTCCATGGTGAAGGA           | <i>VDR Pr 5 F</i><br><i>VDR Pr 5 R</i> | Homo sapiens<br>Homo sapiens | 59,96<br>57,83 | 384              |
| 4  | TGAACTTGCATGAGGAGGAGCA<br>TGTACGTCTGCAGTGTGTTGGA     | <i>VDR Pr 1 F</i><br><i>VDR Pr 1 R</i> | Homo sapiens<br>Homo sapiens | 58.4<br>58.6   | 132              |
| 5  | GCCACTGGCTTTCACCTCAATGCT<br>TCATCATGCCGATGTCCACACA   | <i>VDR Pr 2 F</i><br><i>VDR Pr 2 R</i> | Homo sapiens<br>Homo sapiens | 60,1<br>58,6   | 180              |
| 6  | TGTCGATGGTGCTCAGAACTGCT<br>TCATCATGCCGATGTCCACACA    | <i>VDR Pr 3 F</i><br><i>VDR Pr 3 R</i> | Homo sapiens<br>Homo sapiens | 60,3<br>58,6   | 386              |
| 7  | AACAGCTTGCCACCCGCC<br>TCATCATGCCGATGTCCACACA         | <i>VDR Pr 4 F</i><br><i>VDR Pr 4 R</i> | Homo sapiens<br>Homo sapiens | 60,7<br>58,6   | 532-b*<br>410-c* |
| 8  | TCAGGAAACATGGCTTCCTTCACC<br>ACAAGGACTGCCTGATTGACAAGC | <i>RXRα F</i><br><i>RXRα R</i>         | Homo sapiens<br>Homo sapiens | 71<br>69,4     | 175              |
| 9  | CTCCGACGTGCTAGAACTCA<br>CAGGTGTTAGTGTGGCAGT          | <i>Pdia3 F</i><br><i>Pdia3 R</i>       | Homo sapiens<br>Homo sapiens | 63,2<br>60,3   | 204              |
| 10 | GGCAAGTACCCAGTACGG<br>AGCAAATAGCTTCCAAGG             | <i>CYP27A1 F</i><br><i>CYP27A1 R</i>   | Homo sapiens<br>Homo sapiens | 56,52<br>53,07 | 292              |
| 11 | AGAGACCCAGAAGTGTTCCAT<br>GTCTTTCAGCACAGATGAGGTA      | <i>CYP2R1 F</i><br><i>CYP2R1 R</i>     | Homo sapiens<br>Homo sapiens | 61,6<br>60,9   | 259              |
| 12 | AAGGCACCACCCACCTATGATACT<br>TACTTTGGGTCACGGTGAAGAGCA | <i>CYP3A4 F</i><br><i>CYP3A4 R</i>     | Homo sapiens<br>Homo sapiens | 67,3<br>70,5   | 197              |
| 13 | TGTTTGCATTTGCTCAGA<br>CCGGGAGAGCTCATAACAG            | <i>CYP27B1 F</i><br><i>CYP27B1 R</i>   | Homo sapiens<br>Homo sapiens | 54,63<br>56,79 | 227              |
| 14 | GCAGCCTAGTGCAGATTT<br>ATTCACCCAGAACTGTTG             | <i>CYP24A1 F</i><br><i>CYP24A1 R</i>   | Homo sapiens<br>Homo sapiens | 53,97<br>51,3  | 335              |
| 15 | TCCTGAAAGTTGCAGCTGGAGT<br>GAGCTCATCTATTCTGCCATA      | <i>CYP24SV F</i><br><i>CYP24SV R</i>   | Homo sapiens<br>Homo sapiens | 66,3<br>62,1   | 213              |

\* Depends on VDR isoform PCR product consist of 410 or 532 base pairs.
